# Supplementary material for: GMED: Global Marine Environment Datasets for environment visualisation and species distribution modelling
Source: Copernicus journal article supplement (doi:10.5194/essd-2018-64), 2018-07-27
Supplement: Supplementary file 1 [file essd-2018-64-supplement.zip]

Archive with 4 entries (4 files):
- Supplimentary/Supplementary_FigureS1.pdf
- Supplimentary/Supplementary_FigureS2.pdf
- Supplimentary/Supplimentary_TableS1.csv
- Supplimentary/Supplimentary_TableS2.csv
