# Supplementary material for: GMED: Global Marine Environment Datasets for environment visualisation and species distribution modelling
Source: Copernicus journal article supplement (doi:10.5194/essd-2018-64), 2018-07-27
Supplement: Supplementary file 1 [file essd-2018-64-supplement.zip › Supplimentary/Supplementary_FigureS2.pdf]

## GMED: Global Marine Environment Datasets for environment visualisation and species distribution modelling

Zeenatul Basher<sup>1\*</sup> David A. Bowden<sup>2</sup>, and Mark J. Costello<sup>1</sup>

<sup>1</sup> Institute of Marine Science, The University of Auckland, Auckland 1142, New Zealand,

<sup>2</sup> Coasts and Oceans Centre, National Institute of Water and Atmospheric Research (NIWA), Private Bag 14901, Wellington, New Zealand

### Supplementary Information

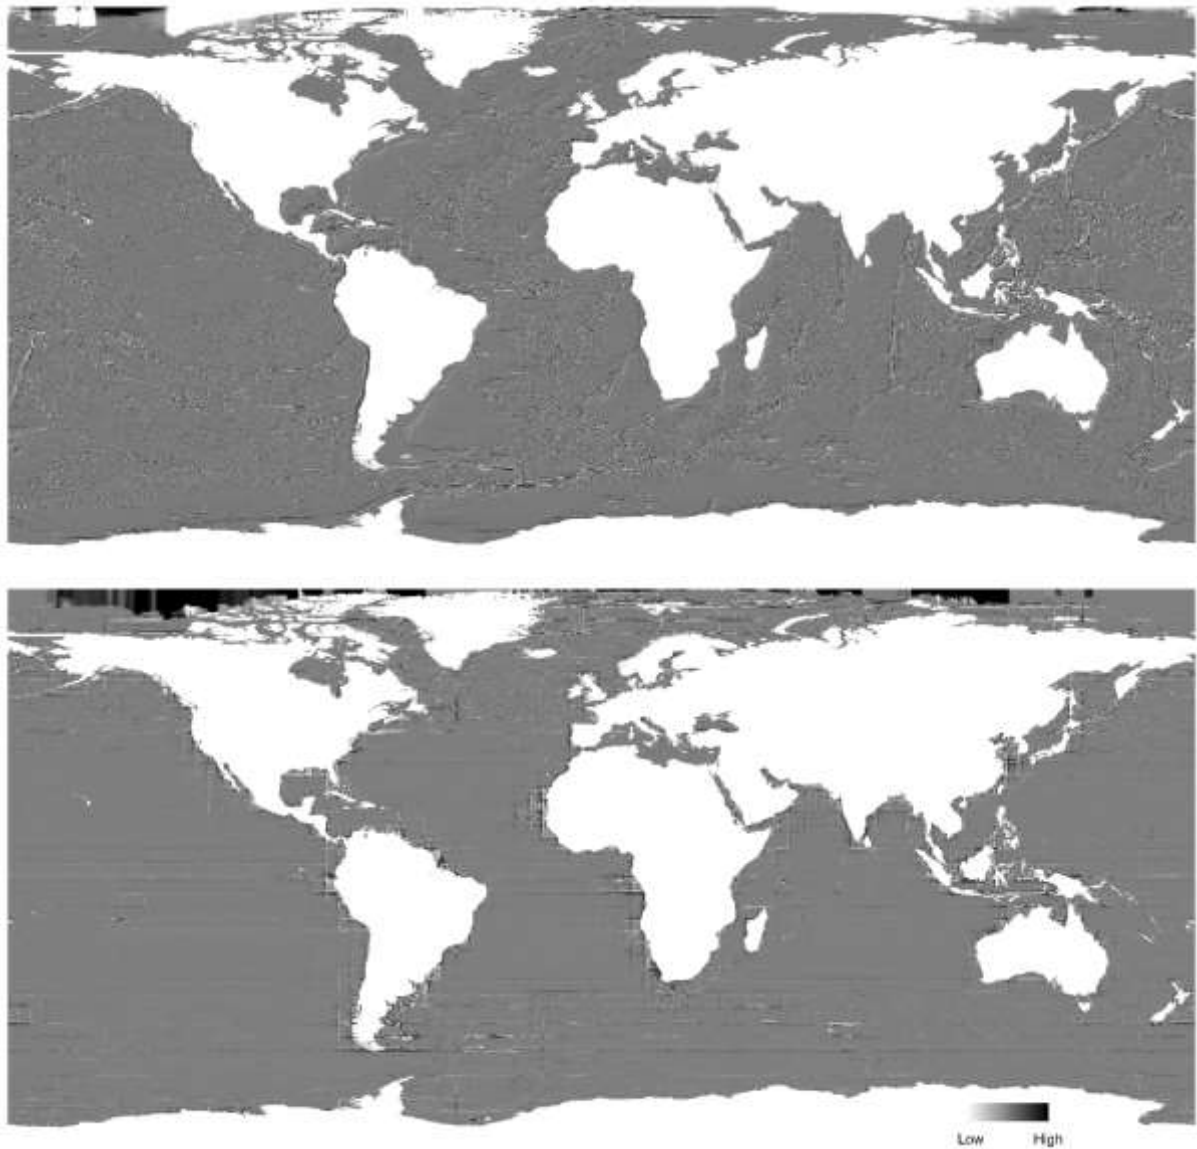

**Figure S2:** Difference between interpolated and source data layers: Depth (top), Primary productivity (bottom). Black areas in the map indicates regions where interpolated pixel differs most from source data layers.
