# Supplementary material for: GMED: Global Marine Environment Datasets for environment visualisation and species distribution modelling
Source: Copernicus journal article supplement (doi:10.5194/essd-2018-64), 2018-07-27
Supplement: Supplementary file 1 [file essd-2018-64-supplement.zip › Supplimentary/Supplimentary_TableS1.csv]

GMED: Global Marine Environment Datasets for environment visualization and species distribution modelling
Zeenatul Basher1*, David A. Bowden2 and Mark J. Costello1
1Institute of Marine Science, The University of Auckland, PO Box 349, Warkworth 0941, New Zealand,
2Coasts and Oceans Centre, National Institute of Water and Atmospheric Research (NIWA), Private Bag 14901, Wellington, New Zealand
Supporting Information
Table S1: Detailed GMED layers data source and description
	Physical
	Layer	File Name Code	Description	Unit	Type	Instrument/Institute	Original Spatial Resolution	Temporal Range	Derivatives	Source	Primary Data Source	URL
	Depth	gb_depth	Water Depth Taken from GEBCO 08 Digital Atlas.	m	-	Depth Soundings, Satellite	30 arc-seconds	-	Mean	GEBCO 08	IOC et al.(2003)	https://www.bodc.ac.uk/data/online_delivery/gebco/select/
	Slope	gb_slope	Slope derived from GEBCO 08 using ArcGIS Spatial Analyst.	degree	-	Interpolation	5 arcmin (9.2 km)	-	-	GEBCO 08	-	-
	Aspect (East-West)	msp_aspect_ew	East/West Aspect of seafloor (sin(aspect in radians))	radians x 100	-	Interpolation	5 arcmin (9.2 km)	-	-	MARSPEC	Becker et al., 2009; Sbrocco & Barber, 2013	http://www.marspec.org/
	Aspect (North-South)	msp_aspect_ns	North/South Aspect of seafloor (sin(aspect in radians))	radians x 100	-	Interpolation	5 arcmin (9.2 km)	-	-	MARSPEC	Becker et al., 2009; Sbrocco & Barber, 2013	http://www.marspec.org/
	Land Distance	msp_distancetoshore	Distance (km) to the nearest land cell (water cells only) calculated using eucleadean distance formula using ArcGIS.	km	-	Eucleadean distance formula	5 arcmin (9.2 km)	-	-	MARSPEC	Becker et al., 2009; Sbrocco & Barber, 2013	http://www.marspec.org/
	Port Distance	port_distance	Distance to the nearest seaport, calculated using Euclidian distance formula using ArcGIS.	eucledian distance	-	Eucleadean distance formula	5 arcmin (9.2 km)	-	-	-	NGIA World Port Index Database (NGIA, 2014)	https://www.nga.mil/Pages/Default.aspx
	Ice Cover	aq_ice_x	Mean annual ice cover in percent as derived from the National Snow and Ice Data Centre. Interpolation was done to get rid of missing cells and values for the ice shelves in the Antarctic was set to 1.5. Example: 0.00000..., 1.0	% (0-1.0)	Annual Climatology	Remote Sensing: Nmbus-7 & DMSP satellites	0.5° x 0.5°	1979-2002	Mean (Summer, Winter)	Aquamaps HCAF v4	U.S. National Snow and Ice Data Centre (Cavalieri et al 2003)	http://www.aquamaps.org/download/main.php
	Tide average	kg_tide_average	Tides, avg of maximum amplitude. These tide model results are from a global 1/4-degree tide model which assimilated tide estimates derived from the TOPEX/Poseidon altimeter.	m	Annual Climatology	University of Colorado, Boulder	0.25° x 0.25°	-	Mean	KGS Mapper	Stewart (2000)	http://instaar.colorado.edu/~scotts/thesis.pdf
	Waveheight	aq_waveheight	Height of waves in scaled discrete classes as provided by the Original LOICZ Database, for all coastal and oceanic cells.	m	-	-	0.5° x 0.5°	-	Mean	Aquamaps HCAF v4	KGS	http://www.aquamaps.org/download/main.php
	Windspeed	kg_wind_speed	Yearly variations of the surface marine atmosphere over the global oceans.	m/s	Annual Climatology	International Research Institute for Climate Prediction (IRI)	0.5° x 0.5°	1945-1989	Mean	KGS Mapper	Da Silva et al. (1994)	http://ingrid.ldgo.columbia.edu/SOURCES/.DASILVA/.SMD94/.climatology/.w3
	Surface Current	ecco2_uv_surface_current	Zonal velocity (UVEL), meridional velocity (VVEL).	m/s	Monthly Climatology	NASA ECCO2 Modeling, Analysis, and Prediction (MAP) project	0.25° x 0.25°	-	Mean (Surface)	NASA ECCO2 Modeling	NASA JPL Laboratory	http://ecco2.jpl.nasa.gov/
	Euphotic Layer Depth	gc_zeu_mean	Depth of the bottom of the Euphotic Layer i.e. the depth for which the down-welling irradiance is 1% of its value at the surface. It characterizes the upper layer of the ocean, which can support phytoplankton photosynthesis. It depends on the turbidity of the water.	m	Monthly climatology	ESA Globeolour Product	2.5 arcmin (4km)	1998-2008	Mean	GlobColour	Morel et al. (2007)	http://hermes.acri.fr/
	Diffuse attenuation coefficient	bo_da_mean	The diffuse attenuation coefficient is an indicator of water clarity. It expresses how deeply visible light in the blue to the green region of the spectrum (490 nm) penetrates in to the water column.	m-1	Monthly climatology	Remote Sensing: Aqua-MODIS	5 arcmin (9.2 km)	2002 - 2009	Mean	Bio-Oracle	Feldman & McClain 2010	http://oceancolor.gsfc.nasa.gov/
	Temperature	bo_sst_x	Sea surface temperature is the temperature of the water at the ocean surface. This parameter indicates the temperature of the topmost meter of the ocean water column.	°C	Monthly climatology	Remote Sensing: Aqua-MODIS	5 arcmin (9.2 km)	2002 - 2009	Mean, Minimum, Maximum, Range	Bio-Oracle	Feldman & McClain 2010	http://oceancolor.gsfc.nasa.gov/
		kg_b_temp	Temperature of sea bottom.	°C	Annual Climatology	World Ocean Atlas 2001	1° x 1°	1874-2000	Mean (Bottom)	KGS Mapper	Stephens et al. (2002)	http://www.nodc.noaa.gov/OC5/WOA01/pr_woa01.html
		na_x_x_sst / na_b_temp	Long term monitoring of Temperature on Multiple Levels.	°C	Monthly Climatology	NOAA 20th Century Reanalysis V2	2° x 2°	1871-2008	Mean (Summer Surface, Winter Surface, Annual Bottom)	NODC	20th Century Reanalysis V2 data provided by the NOAA/OAR/ESRL PSD, Boulder, Colorado, USA	http://www.esrl.noaa.gov/psd/
	Salinity	bo_salinity	Salinity indicates the dissolved salt content in the ocean surface.	PSS	In situ measure: WOD 2009	Standard Level Data: Surface Ocean Station Data (OSD); High-resolution Conductivity-Temperature-Depth (CTD)	1° x 1°	1961-2009	IDW Interpolation	Bio-Oracle	Boyer et al. 2009	http://www.nodc.noaa.gov/
		na_b_salinity	Long term monitoring of Salinity on multiple depth levels.	PPT	Monthly Climatology	NOAA 20th Century Reanalysis V2	2° x 2°	1871-2008	Mean (Surface, Bottom)	NODC	20th Century Reanalysis V2 data provided by the NOAA/OAR/ESRL PSD, Boulder, Colorado, USA	http://www.esrl.noaa.gov/psd/
	Photosynthetically Active Radiation	bo_parmean	Photosynthetically Active Radiation (PAR) indicates the quantum energy flux from the Sun (in the spectral range 400-700 nm) reaching the ocean surface.	Einstein/m²/day	Monthly climatology	Temperature-Depth (CTD) (Surface)	5 arcmin (9.2 km)	1997-2009	Mean	Bio-Oracle	Feldman & McClain 2010	http://oceancolor.gsfc.nasa.gov/
	Chemical
	Layer	File Name Code	Description	Unit	Type	Instrument	Original Spatial Resolution	Temporal Range	Derivatives	Source	Primary Data Source	URL
	Chlorophyll-a	bo_chla_x	Chlorophyll A concentration indicates the concentration of photosynthetic pigment chlorophyll A (the most common “green” chlorophyll) in oceans. Please note that in shallow water these values may reflect any kind of autotrophic biomass.	mg/m³	Monthly climatology	Remote Sensing: Aqua-MODIS	5 arcmin (9.2 km)	2002 - 2009	Mean, Minimum, Maximum, Range	Bio-Oracle	Feldman & McClain 2010	http://oceancolor.gsfc.nasa.gov/
		kg_chla_x	Chlorophyll-a concentration data consists of satellite measurements of global and regional ocean color data.	mg/m³	Annual Climatology	Remote Sensing: SEAWiFS/OrbView-2	~ 5 arcmin (9 km)	1997-2006	Max, Mean, Summer Max, Winter max	KGS Mapper	Feldman & McClain (2006)	http://oceancolor.gsfc.nasa.gov/SeaWIFS/
	Chlorophyll-a (Primary Productivity)	aq_primprod	Proportion of annual primary production in a cell. See reference for details about the productivity calculation methods.	mgC·m-²·/day/cell	Annual Climatology	Remote Sensing : SeaWiFS	~ 5 arcmin (9 km)	-	Mean	Aquamaps HCAF v4	Bouvet et al. (2002), Hoepffner et al. (1999) , Longhurst et al. (1995)	http://www.aquamaps.org/download/main.php and http://www.seaaroundus.org/doc/saup_manual.htm#3
	pH	bo_ph	Measure of acidity in the ocean surface.	-	In situ measure: WOD 2009	Standard Level Data: Surface Ocean Station Data (OSD); High-resolution Conductivity-Temperature-Depth (CTD)	1° x 1°	1910-2007	Mean	Bio-Oracle	Boyer et al. 2009	http://www.nodc.noaa.gov/
	Total Suspended Matter	gc_tcm_mean	Total suspended matter concentration. It is a measure of the turbidity of the water. The product is useful typically for coastal waters where inorganic particle dominate over phytoplankton.	g.m-3	Monthly Climatologu	MERIS	2.5 arcmin (4km)	2002-2012	Mean	GlobColour	Doerffer & Schiller (2007)	http://hermes.acri.fr/
	Nutrients
	Layer	File Name Code	Description	Unit	Type	Instrument	Original Spatial Resolution	Temporal Range	Derivatives	Source	Primary Data Source	URL
	Calcite	bo_calcite	Calcite concentration indicates the concentration of calcite (CaCO3) in oceans.	mol/m³	Seasonal climatology	Remote Sensing: Aqua-MODIS	5 arcmin (9.2 km)	2002 - 2009	Mean	Bio-Oracle	Feldman & McClain 2010	http://oceancolor.gsfc.nasa.gov/
	Nitrate	bo_nitrate	This surface layer contains both [NO3] and [NO3+NO2] data. By this we mean chemically reactive dissolved inorganic nitrate and nitrate or nitrite.	?mol/l	In situ measure: WOD 2009	Standard Level Data: Surface Ocean Station Data (OSD)	1° x 1°	1922 - 1986	Mean	Bio-Oracle	Boyer et al. 2009, NOAA/NGDC Paleoclimatology Program, Boulder CO, USA.	http://www.ncdc.noaa.gov/data-access/paleoclimatology-data
		kg_b_nitrate	Nitrate Concentration.	?mol/l	Annual Climatology	World Ocean Atlas 2001	0.5° x 0.5°	1874-2000	Mean (Bottom)	KGS Mapper	Saving (2006)	http://hercules.kgs.ku.edu/website/specimen_mapper/data/bott_mean06_1.htm
	Phosphate	kg_phosphate / kg_b_phosphate	Phosphorous Concentration.	?mol/l	Annual Climatology	World Ocean Atlas 2001	0.5° x 0.5°	1874-2000	Mean (Surface, Bottom)	KGS Mapper	Saving (2006)	http://hercules.kgs.ku.edu/website/specimen_mapper/data/bott_mean06_1.htm
	Silicate	bo_silicate	This variable indicates the concentration of silicate or ortho-silicic acid [Si(OH)4] in the ocean surface.	?mol/l	In situ measure: WOD 2009	Standard Level Data: Surface Ocean Station Data (OSD)	1° x 1°	1930 - 1986	Mean	Bio-Oracle	Boyer et al. 2009	http://www.nodc.noaa.gov/
		kg_b_silicate	Silicate Concentration.	?mol/l	Annual Climatology	World Ocean Atlas 2001	0.5° x 0.5°	1874-2000	Mean (Bottom)	KGS Mapper	Saving (2006)	http://hercules.kgs.ku.edu/website/specimen_mapper/data/bott_mean06_1.htm
	Dissolved Oxygen	bo_o2dis	Dissolved oxygen concentration [O2] in the surface.	ml/l	In situ measure: WOD 2009	Standard Level Data: Surface Ocean Station Data (OSD); High-resolution Conductivity-Temperature-Depth (CTD)	1° x 1°	1898 - 2009	Mean	Bio-Oracle	Boyer et al. 2009	http://www.nodc.noaa.gov/
		kg_b_o2dissolve	Dissolved Oxygen Concentration	ml/l	Annual Climatology	World Ocean Atlas 2001	0.5° x 0.5°	1874-2000	Mean (Bottom)	KGS Mapper	Conkright et al. (2002)	http://hercules.kgs.ku.edu/website/specimen_mapper/data/bott_mean06_1.htm
	Saturated Oxygen	kg_s_o2saturate	Amount of dissolved oxygen as a percentage of maximum potential oxygen amount that could be present for the given temperature and salinity at standard amospheric pressure (760 mmHg) (i.e., sea level).	ml/l	Annual Climatology	World Ocean Atlas 2001	0.5° x 0.5°	1874-2000	Mean (Surface)	KGS Mapper	Conkright et al. (2002)	http://www.nodc.noaa.gov/OC5/WOA01/pr_woa01.html
	Utilized Oxygen	kg_b_o2utilized	Apparent oxygen utilization (AOU) in ml/l - oxygen saturation concentration minus measured dissolved oxygen concentration.	ml/l	Annual Climatology	World Ocean Atlas 2001	0.5° x 0.5°	1874-2000	Mean (Surface, Bottom)	KGS Mapper	Saving (2006)	http://hercules.kgs.ku.edu/website/specimen_mapper/data/bott_mean06_1.htm
	Particulate Organic Carbon		Particulate Organic Carbon is an important component in the carbon cycle and serves as a primary food sources for aquatic food webs.	mg.m-3	Monthly climatology	SeaWifs, MODIS, VIR	2.5 arcmin (4km)	1998-2008	Mean	GlobColour	Stramski et al. (2008)	http://hermes.acri.fr/
	Particulate Inorganic Carbon		Particulate Inorganic Carbon or suspended calcium carbonate concentration	mg.m-3	Monthly climatology	SeaWifs, MODIS, VIR	2.5 arcmin (4km)	1998-2008	Mean	GlobColour	Balch et al. (2005)	http://hermes.acri.fr/
	Past
	Layer	File Name Code	Description	Unit	Type	Instrument	Original Spatial Resolution	Temporal Range	Derivatives	Source	Primary Data Source	URL
	Last Glacial Maxima Depth	lgm_depth	Water depth calculated from GEBCO 08 (using formula current depth-130 m; the average depth decrease mentioned in literature).	m	-	GEBCO 08	30 arc-seconds	-	Mean	GEBCO 08 - 130 m	IOC et al.(2003), Bintanja et al. (2005)	-
	Last Glacial Maxima Temperature	lgm_sst	Sea surface temperature during last glacial maxima (22 myr).	°C	Gridded Global LGM SST and Salinity Reconstruction	Paleo Reconstruction Model	1° x 1°	19-22 cal.KYrBP	Mean (Surface)	NOAA Paleoclimatology Program	Schäfer-Neth and Paul (2003)	http://www.ncdc.noaa.gov/data-access/paleoclimatology-data
	Last Glacial Maxima Salinity	lgm_salinity	Sea surface salinity during last glacial maxima (22 myr).	PSS	Gridded Global LGM SST and Salinity Reconstruction	Paleo Reconstruction Model	1° x 1°	19-22 cal.KYrBP	Mean (Surface)	NOAA Paleoclimatology Program	Schäfer-Neth and Paul (2003)	http://www.ncdc.noaa.gov/data-access/paleoclimatology-data
	Last Glacial Maxima Ice Thickness	lgm_ice_thickness	Thickness of ice sheets during last glacial maxima (22 myr).	km	Gridded Global LGM SST and Salinity Reconstruction	Paleo Reconstruction Model	1° x 1°	19-22 cal.KYrBP	Mean (Surface)	NOAA Paleoclimatology Program	Peltier (1993)	http://www.ncdc.noaa.gov/data-access/paleoclimatology-data
	Future
	Layer	File Name Code	Description	Unit	Type	Instrument	Original Spatial Resolution	Temporal Range	Derivatives	Source	Primary Data Source	URL
	Temperature at 2100	bo_21k_a1b_sst	Future 4 grids of monthly mean sea surface temperature , A1B (720 ppm stabilization) scenario.	°C	Monthly climatology	UKMO-HadCM3 model	1.25° x 1.25°	2087–2096	Mean	Bio-Oracle	Based on IPCC (WCRP CMIP3) multi-model database (http://esg.llnl.gov:8080/index.jsp).UKMO-HadCM3 model	http://www-pcmdi.llnl.gov/ipcc/model_documentation/ipcc_model_documentation.php
		aq_x_temp_21k/aq_sst_21k	Predicted sea temperature for year 2100.	°C	Annual Climatology	-	0.5° x 0.5°	2090-2099	Mean (Surface, Bottom)	Aquamaps HCAF v5	IPSL model, A2 scenario (http://icmc.ipsl.fr/)	http://www.aquamaps.org/download/main.php
	Salinity at 2100	bo_21k_a1b_salinity	Future 1 grid of average monthly mean sea surface salinity.	ppt	Monthly climatology	UKMO-HadCM3 model	2.75°x 3.75°	2087–2096	Mean	Bio-Oracle	Based on IPCC (WCRP CMIP3) multi-model database (http://esg.llnl.gov:8080/index.jsp).UKMO-HadCM3 model	http://www-pcmdi.llnl.gov/ipcc/model_documentation/ipcc_model_documentation.php
		aq_salinity_21k	Predicted sea salinity for year 2100.	PSU	Annual Climatology	-	0.5° x 0.5°	2090-2099	Mean (Surface, Bottom)	Aquamaps HCAF v5	IPSL model, A2 scenario (http://icmc.ipsl.fr/)	http://www.aquamaps.org/download/main.php
	Chlorophyll-a at 2100	aq_primaryprod_21k	Predicted primary productivity for year 2100.	mgC·m-²·/day	Annual Climatology	-	0.5° x 0.5°	2090-2099	Mean	Aquamaps HCAF v5	IPSL model, A2 scenario (http://icmc.ipsl.fr/)	http://www.aquamaps.org/download/main.php
	Ice Concentration at 2100	aq_ice_con_21k	Predicted ice cover (area proportion) for year 2100.	% (0-1)	Annual Climatology	-	0.5° x 0.5°	2090-2099	Mean	Aquamaps HCAF v5	IPSL model, A2 scenario (http://icmc.ipsl.fr/)	http://www.aquamaps.org/download/main.php
	References:
	Balch, W. M., H. R. Gordon, B. C. Bowler, D. T. Drapeau, and E. S. Booth. (2005) Calcium carbonate measurements in the surface global ocean based on Moderate-Resolution Imaging Spectroradiometer data, JGR, Vol. 110, C07001 http://dx.doi.org/10.1029/2004JC002560
	Bintanja, R., Van De Wal, R.S.W.,Oerlemans, J. 2005. Modelled atmospheric temperatures and global sea levels over the past million years. Nature, 437(7055), 125-128.
	Bouvet, M., Hoepffner, N.,Dowell, M.D. 2002. Parameterization of a spectral solar irradiance model for the global ocean using multiple satellite sensors. Journal of Geophysical Research-Oceans, 107(C12), 8-18. doi:10.1029/2001jc001126.
	Boyer, T. P., Stephens, C., J. I. Antonov, M. E. Conkright, R. A. Locarnini, T. D. O’Brien, H. E. Garcia, 2002: World Ocean Atlas 2001, Volume 2: Salinity. S. Levitus, Ed., NOAA Atlas NESDIS 50, U.S. Government Printing Office, Wash., D.C., 165 pp., CD-ROMs.
	Cavalieri, D.J., Parkinson, C.L.,Vinnikov, K.Y. 2003. 30-Year satellite record reveals contrasting Arctic and Antarctic decadal sea ice variability. Geophysical Research Letters, 30(18). doi:10.1029/2003gl018031.
	Conkright, M.E., Garcia, H.E., O’brien, T.D., Locarnini, R.A., Boyer, T.P., Stephens, C.,Antonov, J.I. 2002. World Ocean Atlas 2001, Volume 4: Nutrients. S. Levitus, Ed. (CD-ROM). In NOAA Atlas NESDIS 52. Washington D.C.: U.S. Government Printing Office, 392p.
	Da Silva, A., Young, A. C., S. Levitus. 1994 . Atlas of Surface Marine Data Volume 1: Algorithms and Procedures, number 6, 1994. Available at: http://iridl.ldeo.columbia.edu/SOURCES/.DASILVA/.SMD94/.halfbyhalf/
	Doerffer R, and Schiller H. 2007. The MERIS Case 2 water algorithm. International Journal of Remote Sensing 28:517-535. 10.1080/01431160600821127
	Feldman, G. C. & McClain, C.R., 2010. Ocean Color Web, SEAWiFS, NASA Goddard Space Flight Center. Eds. Kuring, N., Bailey, S. W. Accessed: October 2010. http://oceancolor.gsfc.nasa.gov/
	Feldman, G.C., C.R. McClain, N. Kuring (ed.), S.W. Bailey (ed.). 2006. Sea-viewing Wide Field-of-View Sensor (SeaWIFS) Level-3 Standard Mapped Images: Chlorophyll-a Mean Concentration Annual and Seasonal Climatologies. NASA Goddard Space Flight Center
	Hoepffner, N., Sturm, B., Finenko, Z.,Larkin, D. 1999. Depth-integrated primary production in the eastern tropical and subtropical North Atlantic basin from ocean colour imagery. International Journal of Remote Sensing, 20(7), 1435-1456.
	Ioc, Iho,Bodc. 2003. Centenary edition of the GEBCO digital atlas,published on CD-ROM on behalf of the Intergovernmental Oceanographic Commission and the International Hydrographic Organization as part of the General Bathymetric Chart of the Oceans. In Liverpool, UK: British Oceanographic Data Centre.
	Longhurst, A., Sathyendranath, S., Platt, T.,Caverhill, C. 1995. An estimate of global primary production in the ocean from satellite radiometer data. Journal of Plankton Research, 17(6), 1245-1271.
	Morel A, Huot Y, Gentili B, Werdell PJ, Hooker SB, and Franz BA. 2007. Examining the consistency of products derived from various ocean color sensors in open ocean (Case 1) waters in the perspective of a multi-sensor approach. Remote Sensing of Environment 111:69-88.
	Peltier, W., 1993, Time Dependent Topography Through Glacial Cycle. IGBP PAGES/World Data Center-A for Paleoclimatology Data Contribution Series # 93-015. NOAA/NGDC Paleoclimatology Program, Boulder CO, USA.
	Saving, S.C. 2006. Half-degree Ocean Floor Analyzed Annual Means from 2001 World Ocean Atlas, v06_1. Kansas Geological Survey. University of Kansas.
	Schäfer-Neth, C. and A. Paul, 2003, Gridded Global LGM SST and Salinity Reconstruction, IGBP PAGES/World Data Center for Paleoclimatology, Boulder Data Contribution Series #2003-046. NOAA/NGDC Paleoclimatology Program, Boulder CO, USA.
	Smolyar I.V. & Zweng M.M. 2009. World Ocean Database 2009. U.S. Gov. Printing Office, Washington D.C.
	Stramski. D., R.A. Reynolds, M. Babin, S. Kaczmarek, M.R. Lewis, R. Rottgers, A. Sciandra, M. Stramska, M.S. Twardowski, B.A. Franz, and H. Claustre (2008). Relationships between the surface concentration of particulate organic carbon and optical properties in the eastern South Pacific and eastern Atlantic Oceans, Biogeosci., 5, 171-201.
	Stephens, C., J. I. Antonov, T. P. Boyer, M. E. Conkright, R. A. Locarnini, T. D. O’Brien, H. E. Garcia, 2002: World Ocean Atlas 2001, Volume 1: Temperature. S. Levitus, Ed., NOAA Atlas NESDIS 49, U.S. Government Printing Office, Wash., D.C., 167 pp., CD-ROMs.
	Stewart, J.S., 2000, "Tidal Energetics: Studies with a Barotropic Model," Ph.D. Thesis, University of Colorado, Boulder, CO.
	Used Major Dataset Reference:
	KGS Mapper : Fautin, D.G.,Buddemeier, R.W. 2011. Biogeoinformatics of the hexacorals, Half-degree Global Oceanic Environmental Database v06_2 (ArcInfo geodatabase format). In KGS Oceanic Dataset. World Wide Web electronic publication by Kansas Geological Survey & HEXACORALLIA Project: http://drysdale.kgs.ku.edu/website/Specimen_Mapper/datadownload.cfm.
	Aquamaps: Kaschner, K., J. S. Ready, E. Agbayani, J. Rius, K. Kesner-Reyes, P. D. Eastwood, A. B. South, S. O. Kullander, T. Rees, C. H. Close, R. Watson, D. Pauly, and R. Froese. Editors 2008 AquaMaps Environmental Dataset: Half-Degree Cells Authority File (HCAF). World Wide Web electronic publication, www.aquamaps.org/data, Version 07/2010.
	Bio-Oracle: Tyberghein, L., Verbruggen, H., Pauly, K., Troupin, C., Mineur, F.,De Clerck, O. 2012. Bio-ORACLE: a global environmental dataset for marine species distribution modelling. Global Ecology and Biogeography, 21(2), 272-281. doi:10.1111/j.1466-8238.2011.00656.x. URL: http://www.oracle.ugent.be/index.html
	MARSPEC: Sbrocco, E. J. and Barber, P. H. (2013) MARSPEC: ocean climate layers for marine spatial ecology. Ecology 94: 979. doi:10.1890/12-1358.1 . URL: http://www.marspec.org/
