# Supplementary material for: GMED: Global Marine Environment Datasets for environment visualisation and species distribution modelling
Source: Copernicus journal article supplement (doi:10.5194/essd-2018-64), 2018-07-27
Supplement: Supplementary file 1 [file essd-2018-64-supplement.zip › Supplimentary/Supplimentary_TableS2.csv]

GMED: Global Marine Environment Datasets for environment visualization and species distribution modelling
Zeenatul Basher1*, David A. Bowden2 and Mark J. Costello1
1Institute of Marine Science, The University of Auckland, PO Box 349, Warkworth 0941, New Zealand,
2Coasts and Oceans Centre, National Institute of Water and Atmospheric Research (NIWA), Private Bag 14901, Wellington, New Zealand
Supporting Information
Table S2: Pearson correlation matrix of GMED Data Layers. Layers with significant correlations (> � 0.5) were highlighted in red.
	Depth	Slope	Aspect (East-West)	Aspect (North-South)	Land Distance	Port Distance	Ice Cover (Annual)	Ice Cover (May-Oct)	Ice Cover (Nov-Apr)	Wave Height	Wind Speed	Tide average	Current	Euphotic Layer Bottom Depth	Diffuse Attenuation Coefficient	Temperature	Temperature Maximum	Temperature Minimum	Temperature Range	Temperature (May-Oct)	Temperature (Nov-Apr)	Water Column Temperature	Seabed Temperature	Salinity	Water Column Salinity	Photosynthetically Active Radiation	Chlorophyll-a	Chlorophyll-a Max	Chlorophyll-a Min	Chlorophyll-a Range	Chlorophyll-a (May-Oct) Maximum	Chlorophyll-a (Nov-Apr) Maximum	Primary Productivity	pH	Total Suspended Matter	Calcite	Nitrate	Seabed Nitrate	Phosphate	Seabed Phosphate	Silicate	Seabed Silicate	Dissolved O2	Seabed Dissolved O2	Saturated O2	Seabed Utilized O2	Potential Organic Carbon	Potential In-organic Carbon
Depth	1.000
Slope	0.040	1.000
Aspect (East-West)	0.007	0.013	1.000
Aspect (North-South)	0.042	0.035	-0.002	1.000
Land Distance	-0.475	-0.069	-0.005	-0.022	1.000
Port Distance	-0.198	0.016	0.011	0.084	0.453	1.000
Ice Cover (Annual)	0.447	0.008	0.015	0.192	-0.248	0.222	1.000
Ice Cover (May-Oct)	0.307	0.042	0.014	0.200	-0.190	0.354	0.908	1.000
Ice Cover (Nov-Apr)	0.479	-0.015	0.014	0.183	-0.236	0.037	0.893	0.757	1.000
Wave Height	0.429	0.000	-0.002	-0.045	-0.309	-0.282	-0.011	-0.051	0.036	1.000
Wind Speed	-0.377	0.025	0.003	-0.071	0.393	0.261	-0.456	-0.332	-0.436	-0.185	1.000
Tide average	0.070	-0.031	0.016	-0.027	-0.178	-0.085	-0.037	0.045	-0.086	0.111	-0.044	1.000
Current	-0.012	0.012	-0.004	-0.001	0.155	0.139	-0.025	-0.014	-0.031	-0.026	0.262	-0.104	1.000
Euphotic Layer Bottom Depth	-0.563	0.060	0.015	-0.046	0.255	0.043	-0.452	-0.369	-0.434	-0.309	0.070	-0.085	-0.105	1.000
Diffuse Attenuation Coefficient	0.548	-0.068	-0.020	0.038	-0.337	-0.105	0.325	0.238	0.317	0.401	-0.203	0.069	0.013	-0.725	1.000
Temperature	-0.313	-0.004	-0.004	-0.124	-0.035	-0.444	-0.619	-0.593	-0.518	0.007	-0.145	0.113	-0.282	0.600	-0.354	1.000
Temperature Maximum	-0.295	-0.016	-0.001	-0.138	-0.041	-0.484	-0.663	-0.644	-0.542	0.048	-0.109	0.116	-0.268	0.556	-0.301	0.986	1.000
Temperature Minimum	-0.320	0.001	-0.005	-0.112	-0.031	-0.408	-0.580	-0.550	-0.491	-0.025	-0.164	0.114	-0.292	0.621	-0.383	0.992	0.961	1.000
Temperature Range	0.091	-0.066	0.012	-0.097	-0.070	-0.314	-0.314	-0.358	-0.196	0.270	0.149	0.009	0.048	-0.191	0.282	0.051	0.211	-0.065	1.000
Temperature (May-Oct)	-0.321	-0.004	-0.003	-0.126	-0.016	-0.414	-0.630	-0.601	-0.532	-0.003	-0.134	0.107	-0.278	0.610	-0.364	0.992	0.973	0.989	0.016	1.000
Temperature (Nov-Apr)	-0.288	-0.012	-0.004	-0.130	-0.057	-0.453	-0.587	-0.597	-0.506	0.018	-0.174	0.111	-0.287	0.572	-0.313	0.973	0.963	0.965	0.067	0.965	1.000
Water Column Temperature	-0.140	-0.010	-0.003	-0.136	-0.057	-0.462	-0.579	-0.603	-0.474	0.103	-0.067	0.056	-0.179	0.463	-0.239	0.834	0.844	0.813	0.172	0.827	0.833	1.000
Seabed Temperature	0.334	-0.057	0.004	-0.047	-0.222	-0.335	-0.268	-0.239	-0.213	0.431	-0.150	0.153	-0.051	-0.104	0.197	0.348	0.375	0.313	0.245	0.336	0.300	0.356	1.000
Salinity	-0.415	0.052	0.001	-0.120	0.199	-0.012	-0.610	-0.448	-0.632	-0.133	0.298	0.168	-0.057	0.465	-0.561	0.503	0.486	0.507	-0.058	0.506	0.451	0.445	0.149	1.000
Water Column Salinity	-0.254	0.027	0.000	-0.024	0.126	0.002	-0.342	-0.220	-0.284	-0.097	0.283	0.096	-0.002	0.177	-0.174	0.227	0.233	0.225	0.041	0.227	0.182	0.209	0.021	0.300	1.000
Photosynthetically Active Radiation	-0.228	-0.022	-0.010	-0.107	-0.087	-0.377	-0.562	-0.542	-0.472	0.034	-0.181	0.133	-0.365	0.525	-0.266	0.909	0.889	0.913	-0.001	0.913	0.889	0.737	0.294	0.463	0.229	1.000
Chlorophyll-a	0.246	-0.042	-0.012	0.025	-0.153	-0.058	0.118	0.064	0.113	0.231	-0.150	0.005	-0.011	-0.276	0.771	-0.088	-0.059	-0.106	0.172	-0.088	-0.054	-0.029	0.135	-0.423	-0.042	-0.038	1.000
Chlorophyll-a Max	0.306	-0.040	-0.020	0.010	-0.200	-0.090	0.106	0.062	0.109	0.292	-0.151	0.036	-0.016	-0.345	0.802	-0.108	-0.069	-0.132	0.229	-0.112	-0.081	-0.054	0.170	-0.391	-0.056	-0.044	0.918	1.000
Chlorophyll-a Min	0.169	-0.035	-0.005	0.024	-0.104	-0.053	0.094	0.036	0.087	0.153	-0.116	-0.021	-0.005	-0.197	0.635	-0.059	-0.040	-0.071	0.118	-0.057	-0.026	-0.008	0.099	-0.363	-0.022	-0.032	0.901	0.717	1.000
Chlorophyll-a Range	0.281	-0.031	-0.023	0.001	-0.187	-0.079	0.079	0.056	0.085	0.277	-0.131	0.050	-0.018	-0.316	0.695	-0.094	-0.056	-0.117	0.219	-0.100	-0.077	-0.055	0.160	-0.315	-0.054	-0.030	0.750	0.939	0.445	1.000
Chlorophyll-a (May-Oct) Maximum	0.365	-0.051	-0.014	0.035	-0.227	-0.123	0.205	0.122	0.225	0.315	-0.216	-0.003	-0.009	-0.402	0.722	-0.146	-0.119	-0.164	0.170	-0.148	-0.114	-0.063	0.198	-0.483	-0.107	-0.090	0.726	0.692	0.651	0.565	1.000
Chlorophyll-a (Nov-Apr) Maximum	0.289	-0.039	-0.022	-0.005	-0.183	-0.141	0.015	0.016	0.039	0.357	-0.144	0.080	0.005	-0.331	0.526	-0.034	0.002	-0.065	0.242	-0.043	-0.050	-0.033	0.385	-0.194	-0.070	-0.020	0.446	0.498	0.334	0.467	0.524	1.000
Primary Productivity	0.338	-0.056	-0.040	-0.100	-0.262	-0.367	-0.227	-0.242	-0.147	0.474	-0.030	0.208	-0.028	-0.487	0.575	0.110	0.180	0.057	0.446	0.098	0.101	0.151	0.489	-0.105	-0.001	0.140	0.367	0.485	0.237	0.485	0.426	0.559	1.000
pH	-0.567	-0.008	0.000	-0.494	0.251	-0.290	-0.287	-0.310	-0.156	-0.032	-0.122	0.505	-0.100	0.363	-0.260	0.429	0.446	0.409	0.106	0.423	0.429	0.438	0.010	0.205	0.013	0.354	-0.222	-0.153	-0.242	-0.074	-0.198	-0.113	-0.088	1.000
Total Suspended Matter	0.419	-0.019	0.010	0.100	-0.234	0.021	0.585	0.455	0.519	0.131	-0.343	-0.078	-0.003	-0.434	0.518	-0.374	-0.388	-0.365	-0.087	-0.383	-0.328	-0.298	-0.012	-0.470	-0.245	-0.337	0.379	0.327	0.394	0.219	0.430	0.253	0.062	-0.812	1.000
Calcite	-0.323	0.029	0.017	-0.039	0.059	-0.206	-0.296	-0.286	-0.238	-0.159	-0.175	-0.005	-0.235	0.673	-0.446	0.673	0.644	0.684	-0.088	0.668	0.664	0.549	0.003	0.341	0.170	0.620	-0.122	-0.175	-0.079	-0.166	-0.205	-0.190	-0.251	0.543	-0.246	1.000
Nitrate	-0.047	0.044	0.003	0.067	0.172	0.649	0.218	0.394	0.006	-0.125	0.367	0.103	0.272	-0.280	0.091	-0.702	-0.719	-0.677	-0.211	-0.674	-0.711	-0.662	-0.270	-0.071	0.008	-0.606	-0.009	0.002	-0.025	0.014	-0.039	-0.011	-0.132	-0.255	0.069	-0.517	1.000
Seabed Nitrate	-0.632	0.104	-0.007	-0.091	0.329	0.278	-0.452	-0.280	-0.530	-0.347	0.359	0.112	0.000	0.483	-0.486	0.281	0.258	0.298	-0.140	0.305	0.259	0.117	-0.369	0.381	0.194	0.251	-0.228	-0.251	-0.187	-0.204	-0.365	-0.273	-0.239	0.784	-0.438	0.231	0.227	1.000
Phosphate	0.026	0.034	0.008	0.055	0.138	0.604	0.275	0.410	0.092	-0.095	0.326	0.087	0.243	-0.365	0.129	-0.748	-0.764	-0.722	-0.213	-0.721	-0.754	-0.714	-0.259	-0.171	-0.054	-0.644	-0.012	0.010	-0.034	0.026	-0.024	0.008	-0.103	-0.436	0.120	-0.559	0.931	0.177	1.000
Seabed Phosphate	-0.556	0.085	-0.004	-0.089	0.281	0.261	-0.396	-0.248	-0.473	-0.304	0.304	0.128	-0.005	0.425	-0.406	0.249	0.231	0.263	-0.111	0.273	0.233	0.105	-0.365	0.289	0.148	0.228	-0.182	-0.199	-0.154	-0.158	-0.309	-0.239	-0.204	0.726	-0.366	0.196	0.223	0.953	0.200	1.000
Silicate	0.060	0.046	0.014	0.105	-0.033	0.553	0.447	0.626	0.199	-0.089	0.118	0.240	0.149	-0.301	0.183	-0.640	-0.663	-0.610	-0.227	-0.627	-0.641	-0.648	-0.230	-0.182	-0.027	-0.534	0.053	0.066	0.017	0.072	0.039	0.017	-0.139	-0.399	0.195	-0.423	0.862	0.130	0.832	0.155	1.000
Seabed Silicate	-0.644	0.047	-0.006	-0.072	0.341	0.304	-0.412	-0.262	-0.491	-0.328	0.340	0.069	0.012	0.435	-0.401	0.227	0.211	0.239	-0.098	0.251	0.214	0.053	-0.318	0.272	0.169	0.207	-0.162	-0.201	-0.121	-0.176	-0.285	-0.227	-0.245	0.732	-0.357	0.177	0.249	0.921	0.216	0.921	0.165	1.000
Dissolved O2	0.369	0.001	0.004	0.124	-0.024	0.382	0.661	0.611	0.574	0.016	0.065	-0.132	0.254	-0.640	0.388	-0.969	-0.959	-0.959	-0.065	-0.967	-0.941	-0.813	-0.331	-0.586	-0.280	-0.882	0.111	0.131	0.078	0.112	0.182	0.043	-0.095	-0.417	0.435	-0.643	0.623	-0.344	0.678	-0.303	0.597	-0.281	1.000
Seabed Dissolved O2	0.264	-0.091	0.016	0.111	-0.069	0.107	0.498	0.402	0.482	0.031	-0.066	-0.111	0.104	-0.383	0.304	-0.555	-0.557	-0.542	-0.077	-0.561	-0.521	-0.422	-0.231	-0.313	-0.116	-0.474	0.130	0.124	0.114	0.086	0.185	0.039	-0.087	-0.121	0.369	-0.286	0.182	-0.682	0.169	-0.700	0.196	-0.665	0.560	1.000
Saturated O2	-0.217	-0.053	-0.023	-0.211	0.106	-0.515	-0.796	-0.860	-0.543	0.110	0.203	-0.078	-0.044	0.240	-0.208	0.647	0.711	0.596	0.458	0.630	0.630	0.631	0.225	0.199	0.108	0.568	-0.045	-0.029	-0.023	-0.025	-0.065	0.003	0.281	0.287	-0.345	0.372	-0.623	0.125	-0.629	0.090	-0.766	0.095	-0.664	-0.367	1.000
Seabed Utilized O2	-0.423	0.106	-0.017	-0.100	0.179	0.059	-0.416	-0.323	-0.418	-0.222	0.173	0.060	-0.073	0.406	-0.372	0.401	0.394	0.405	-0.020	0.414	0.384	0.256	-0.199	0.225	0.117	0.355	-0.163	-0.174	-0.137	-0.136	-0.252	-0.195	-0.108	0.687	-0.356	0.271	-0.032	0.859	-0.029	0.880	-0.064	0.837	-0.423	-0.901	0.227	1.000
Potential Organic Carbon	0.453	-0.072	-0.024	0.020	-0.275	-0.150	0.224	0.126	0.254	0.371	-0.181	0.054	0.006	-0.593	0.810	-0.245	-0.191	-0.276	0.301	-0.257	-0.201	-0.135	0.167	-0.528	-0.122	-0.166	0.663	0.698	0.528	0.620	0.682	0.465	0.546	-0.254	0.398	-0.325	0.005	-0.419	0.041	-0.344	0.087	-0.343	0.286	0.250	-0.048	-0.294	1.000
Potential In-organic Carbon	0.312	0.024	0.011	0.140	-0.140	0.064	0.659	0.570	0.667	-0.008	-0.317	0.084	-0.011	-0.316	0.147	-0.384	-0.411	-0.364	-0.202	-0.399	-0.376	-0.385	-0.150	-0.409	-0.257	-0.409	0.021	0.019	0.010	0.018	0.093	0.014	-0.134	-0.103	0.375	-0.184	0.067	-0.329	0.129	-0.293	0.208	-0.319	0.399	0.305	-0.535	-0.287	0.123	1.000
PAST
	Depth	Temperature	Salinity	IceThickness
Depth	1
Temperature	-0.160	1
Salinity	-0.226	0.337	1
IceThickness	0.222	-0.084	-0.375	1
Future
	Temp_a1b	Temp_a2	BottomTemp	Salinity_a1b	Salinity_a2	BottomSalinity	Chla_primpord	Ice_concentration
Temp_a1b	1
Temp_a2	0.988	1
BottomTemp	0.277	0.262	1
Salinity_a1b	0.385	0.389	-0.042	1
Salinity_a2	0.385	0.389	-0.042	1.000	1
BottomSalinity	0.120	0.115	0.004	0.796	0.796	1
Chla_primpord	0.038	0.020	0.508	-0.326	-0.326	-0.267	1
Ice_concentration	-0.522	-0.529	-0.163	-0.168	-0.168	-0.063	-0.12709	1
